# Supplementary material for: Are the Hydantoin-1,3,5-triazine 5-HT6R Ligands a Hope to a Find New Procognitive and Anti-Obesity Drug? Considerations Based on Primary In Vivo Assays and ADME-Tox Profile In Vitro
Source: PubMed Central journal article supplement (PMC6943527; doi:10.3390/molecules24244472), 2019-12-06
Supplement: molecules-24-04472-s001.pdf [file molecules-24-04472-s001.pdf]

## Supporting Information

# Are the hydantoin-1,3,5-triazine 5-HT<sub>6</sub>R ligands a hope to find new procognitive and anti-obesity drug? Considerations based on primary *in vivo* assays and ADME-Tox profile *in vitro*.

Annamaria Lubelska, Gniewomir Latacz, Magdalena Jastrzębska-Więsek, Magdalena Kotańska, Rafał Kurczab, Anna Partyka, Małgorzata Anna Marć, Daria Wilczyńska, Agata Doroz-Plonka, Dorota Łażewska, Anna Wesolowska, Katarzyna Kieć-Kononowicz and Jadwiga Handzlik\*

### I. Characteristics of tested triazines [19]

#### Purity and chemical characteristics of DJ-18 [19]:

##### Chemical nomenclature:

1-(4-Chlorobenzyl)-3-((4-amino-6-(4-methylpiperazin-1-yl)-1,3,5-triazin-2-yl)methyl)-5,5-dimethylimidazolidine-2,4-dione

**Chemical formula:** C<sub>21</sub>H<sub>27</sub>N<sub>8</sub>O<sub>2</sub>Cl (MW458.95)

**Chemical form:** White solid, m.p. 204-205 °C.

##### NMR analyses:

<sup>1</sup>H-NMR (300MHz, DMSO-d<sub>6</sub>) δ [ppm]: 7.38 (s, 4H, Ph-2,3,5,6-H), 6.87 (br. s., 2H, NH<sub>2</sub>), 4.51 (s, 2H, Ph-CH<sub>2</sub>), 4.27 (s, 2H, TR-CH<sub>2</sub>), 3.55 (br. s., 4H, Pp-2,6-H), 2.15 (s, 7H, Pp-3,5-H +Pp-CH<sub>3</sub>), 1.26 (s, 6H, 2 CH<sub>3</sub>).

##### Purity:

LC/MS+: Purity: 100%, t<sub>R</sub> = 3.94, (ESI) m/z [M+ H]<sup>+</sup> 459.23.

#### Purity and chemical characteristics of KMP-10:

##### Chemical nomenclature:

3-((4-Amino-6-(4-methylpiperazin-1-yl)-1,3,5-triazin-2-yl)methyl)-5-methyl-5-(naphthalen-2-yl)imidazolidine-2,4-dione

**Chemical formula:** C<sub>23</sub>H<sub>26</sub>N<sub>8</sub>O<sub>2</sub> (MW446.50)

**Chemical form:** White solid, m.p. 144 °C.

**NMR analyses:**

<sup>1</sup>H-NMR (300MHz, DMSO-d<sub>6</sub>) δ [ppm]: 9.12 (s, 1H, N1-H), 8.07 (s, 1H, Napht-1-H), 7.93–7.99 (m, 3H,

Napht-4,5,8-H), 7.72–7.74 (d def., 1H, Napht-3-H), 7.54–7.57 (m, 2H, Napht-6,7-H), 6.85 (s, 2H, NH<sub>2</sub>), 4.27 (s, 2H, N3-CH<sub>2</sub>), 3.40–3.60 (m, 2H, Pp-2,6-H<sub>b</sub>), 3.05–3.20 (m, 2H, Pp-2,6-H<sub>a</sub>), 2.09 (s, 4H, Pp-3,5-H), 2.00 (s, 3H, N-CH<sub>3</sub>), 1.83 (s, 3H, 5-CH<sub>3</sub>).

<sup>13</sup>C-NMR (75MHz, DMSO-d<sub>6</sub>) δ [ppm]: 175.56, 172.01, 166.95, 164.53, 155.92, 137.75, 132.96, 132.81, 128.62, 128.57, 127.89, 126.95, 126.90, 124.51, 124.33, 63.56, 53.90, 46.00, 42.56, 42.47, 25.94.

**Purity:**

LC/MS+: Purity: 99.11%, tR = 3.49, (ESI) m/z [M]<sup>+</sup> 447.20.

[19] Kurczab, R.; Ali, W.; Łażewska, D.; Kotańska, M.; Jastrzębska, M.; Satała, G.; Więcek, M.; Lubelska, A.; Wesółowska, A.; Latacz, G.; et al. Computer-Aided Studies for Novel Arylhydantoin 1,3,5-Triazine Derivatives as 5-HT<sub>6</sub> Serotonin Receptor Ligands with Antidepressive-Like, Anxiolytic and Antiobesity Action In Vivo. *Molecules* **2018**, *23*, 1–26.

---

## II. Additional data for *in vivo* assays performed

Table S1. Effect of KMP-10 on total exploration in the EPM test in rats.

| Treatment | Dose (mg/kg) | Total distance (cm)            | X Ambulation                 | Y Ambulation                 |
|-----------|--------------|--------------------------------|------------------------------|------------------------------|
| Vehicle   | 0            | 3375 ± 344                     | 120 ± 15                     | 89 ± 10                      |
| KMP-10    | 0.3          | 3240 ± 209                     | 116 ± 18                     | 98 ± 20                      |
|           | 1            | 4558 ± 205                     | 152 ± 17                     | 63 ± 12                      |
|           | 3            | 3881 ± 298<br>F(3,22)=2.192 NS | 131 ± 18<br>F(3,22)=0.883 NS | 133 ± 25 F(3,22)=2.708<br>NS |

KMP-10 was given i.p. 60 min before the test. Values represent the mean ± SEM of the total distance, X ambulation, and Y ambulation during 5-min test session compared to the vehicle group (one-way ANOVA followed by Bonferroni's post hoc test); NS=non-significant. N=6-8

## II. Additional data for metabolite studies *in vitro*

MS spectra and MS ion fragment analyses of **DJ-18** and its main metabolite

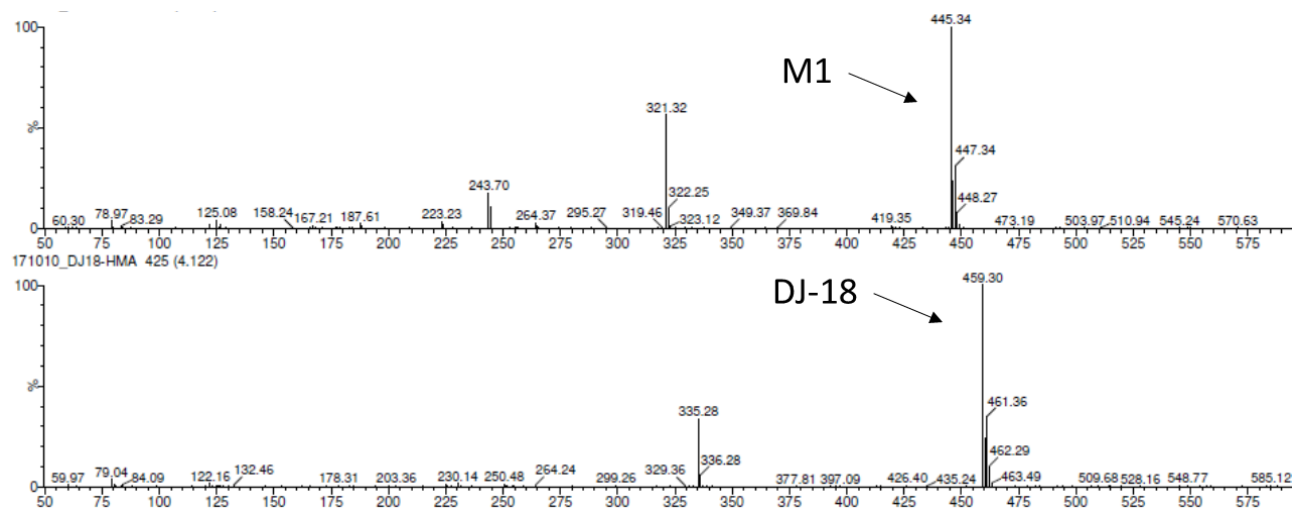

Figure S1 MS spectra of compound **DJ-18** and its main metabolite M1.

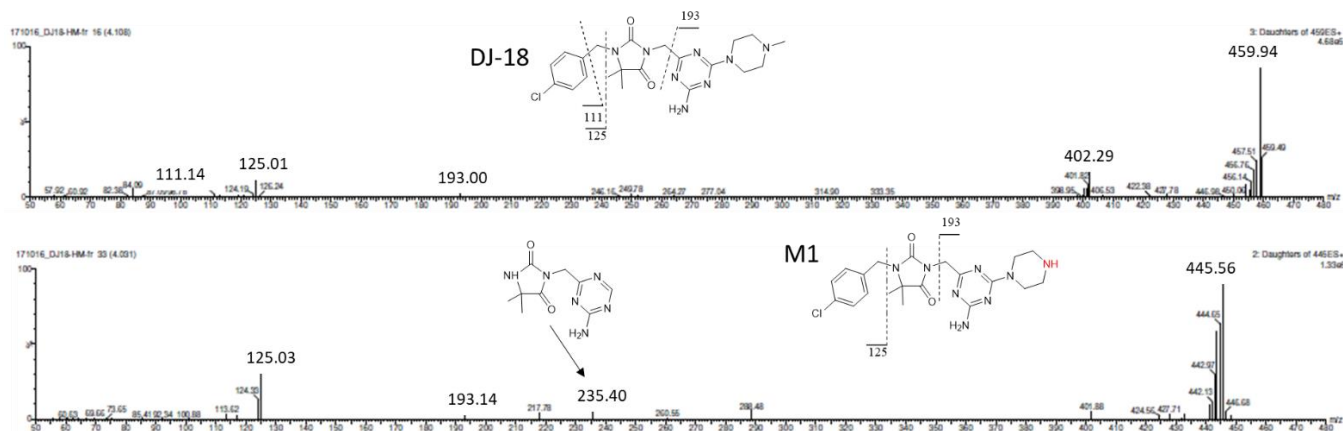

Figure S2 MS/MS ion fragment analysis of compound **DJ-18** and its main metabolite M1.

# MS spectra and MS ion fragment analyses of **KMP-10** and its main metabolite

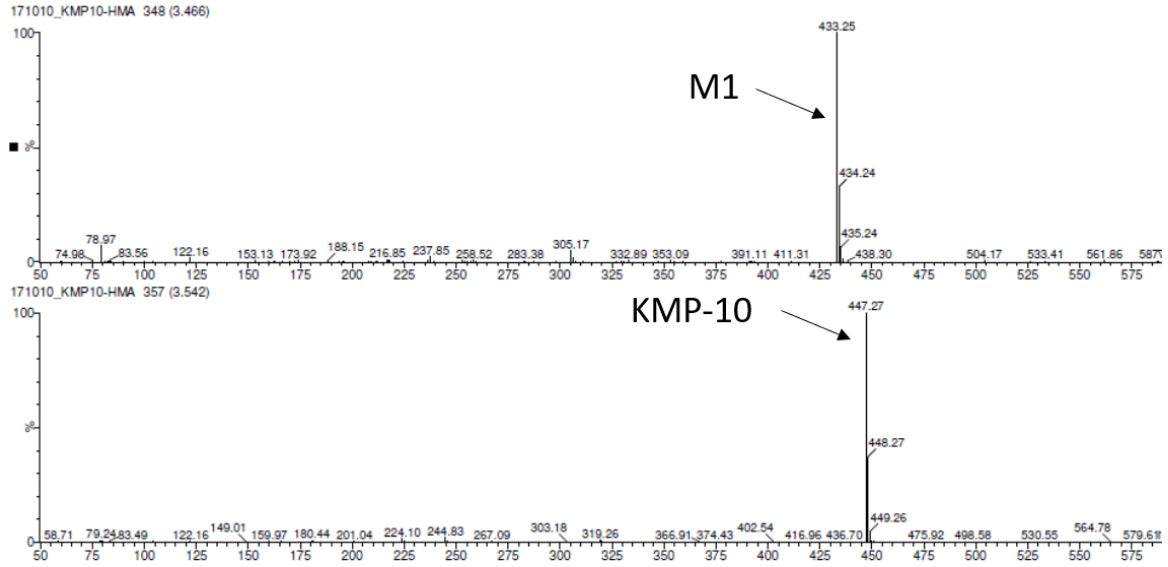

Figure S3 MS spectra of compound **KMP-10** and its main metabolite **M1**.

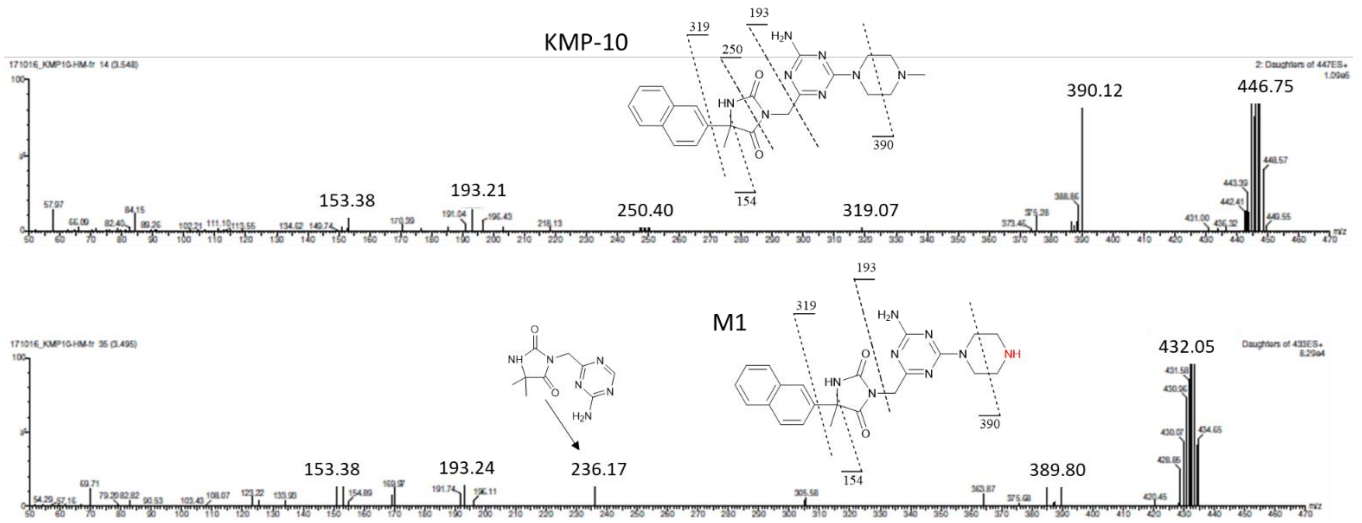

Figure S4 MS/MS ion fragment analysis of compound **DJ-18** and its main metabolite **M1**.
